# Supplementary material for: Rapid differential diagnosis of the B.1.617.2 (delta) variant of SARS-CoV-2 using an automated Cas12a–microfluidic system
Source: Royal Society of Chemistry journal article supplement (doi:10.1039/d1cc04874k), 2021-01-01
Supplement: d1cc04874k1.pdf [file d1cc04874k1.pdf]

## Electronic Supplementary Information

### **Rapid Differential Diagnosis of The B.1.617.2 (delta) variant of Covid-19 with automated Cas12a-Microfluidic System**

Pintao Li<sup>a#</sup>, Jin Zhang<sup>b#</sup>, Qiuyuan Lin<sup>a</sup>, Jilie Kong<sup>a</sup>, Xueen Fang<sup>a\*</sup>

<sup>a</sup>Department of Chemistry and Institutes of Biomedical Sciences, Fudan University, Shanghai  
200433, P. R. China

<sup>b</sup>Qingdao International Travel Healthcare Center, Qingdao Customs, Qingdao 266071, P. R. China

## Experimental Section

### Materials and reagents

LbCas12a Nuclease was purchased from Shanghai Tolo Biotechnology. The centrifugal microfluidic chip and detection equipment were obtained from Shanghai Suxin Biotechnology. sgRNA was purchased from Guangzhou biolifesci Biotechnology. All HPLC-purified sequences were purchased from Sangon Biotech (Shanghai) Co., Ltd. (Table S1). The RT-PCR clinical samples were provided by Qingdao International Travel Healthcare Center.

**Table S1** Sequences of the oligonucleotides used in the experiments.

| Name                                   | Sequence                                                                                                                                                                                                                                                                                                                                                                                                                                                                                                                                                                               |
|----------------------------------------|----------------------------------------------------------------------------------------------------------------------------------------------------------------------------------------------------------------------------------------------------------------------------------------------------------------------------------------------------------------------------------------------------------------------------------------------------------------------------------------------------------------------------------------------------------------------------------------|
| Forward Primer                         | GACAAATCGCTCCAGGGCAAAC                                                                                                                                                                                                                                                                                                                                                                                                                                                                                                                                                                 |
| Reverse Primer                         | GTTGCAATATGGCAGTTTTTGTACACA                                                                                                                                                                                                                                                                                                                                                                                                                                                                                                                                                            |
| Plasmid of the wild type of SARS-CoV-2 | <u>GACAAATCGCTCCAGGGCAAAC</u> TGGAAAGATTG<br>CTGATTATAATTATAAATTACCAGATGATTTTACAG<br>GCTGCGTTATAGCTTGGAAATTCTAACAATCTTGAT<br>TCTAAGGTTGGTGGTAATTATAATTA <u>CCTGTATAG</u><br><u>ATTGTTIAGGA</u> AGTCTAATCTCAAACCTTTTGAG<br>AGAGATATTTCAACTG <u>AAATCTATCAGGCCGTA</u><br><u>GCACACCTTGTAATGGTGTGAAGGTTTTAATTG</u><br>TTACTTTCCTTTACAATCATATGGTTTCCAACCCA<br>CTAATGGTGTGGTTACCAACCATACAGAGTAGT<br>AGTACTTCTTTTGAACCTTCTACATGCACCAGCA<br>ACTGTTTGTGGACCTAAAAAGTCTACTAATTGG<br>TTAAAACAAATGTGTCAATTTCAACTTCAATGG<br>TTAACAGGCACAGGTGTTCTTACTGAGTCTAAC<br>AAAAAGTTTCTGCCTTTCCAACAATTTGGCAGAG |

ACATTGCTGACACTACTGATGCTGTCCGTGATCC  
ACAGACACTTGAGATTCTTGACATTACACCATGT  
TCTTTTGGTGGTGTGTCAGTGTATAACACCAGGAA  
CAAATACTTCTAACCAGGTTGCTGTTCTTTATCAG  
GATGTTAACTGCACAGAAGTCCCTGTTGCTATTC  
ATGCAGATCAACTACTCCTACTTGGCGTGTTTAT  
TCTACAGGTTCTAATGTTTTTCAAACACGTGCAG  
GCTGTTTAATAGGGGCTGAACATGTCAACAACCTC  
ATATGAGTGTGACATACCCATTGGTGCAGGTATAT  
GCGCTAGTTATCAGACTCAGACTAATTCTCCTCG  
GCGGGCACGTAGTGTAGCTAGTCAATCCATCATT  
GCCTACACTATGTCACTTGGTGCAGAAAATTCAG  
TTGCTTACTCTAATAACTCTATTGCCATACCCACA  
AATTTTACTATTAGTGTACCACAGAAATTCTACC  
AGTGTCTATGACCAAGACATCAGTAGATTGTACA  
ATGTACATTTGTGGTGATTCAACTGAATGCAGCA  
ATCTTTTGTTGCAATATGGCAGTTTTTGTACACA

Plasmid of the delta variant of GACAAATCGCTCCAGGGCAAACTGGAAAGATTG  
SARS-CoV-2 CTGATTATAAATTATAAATTACCAGATGATTTTACAG  
GCTGCGTTATAGCTTGGAAATTCTAACAATCTTGAT  
TCTAAGGTTGGTGGTAATTATAATTACCGGTATAG  
ATTGTTTAGGAAGTCTAATCTCAAACCTTTTGGAG  
AGAGATATTTCAACTGAAATCTATCAGGCCGGTA  
GCAAACCTTGTAATGGTGTGAAGGTTTTAATTG  
TTACTTTTCTTTACAATCATATGGTTTCCAACCCA  
CTAATGGTGTGGTTACCAACCATAACAGAGTAGT  
AGTACTTTCTTTTGAACCTTCTACATGCACCAGCA  
ACTGTTTGTGGACCTAAAAAGTCTACTAATTTGG

TTAAAAACAAATGTGTCAATTTCAACTTCAATGG  
 TTAAACAGGCACAGGTGTTCTTACTGAGTCTAAC  
 AAAAAGTTTCTGCCTTTCCAACAATTTGGCAGAG  
 ACATTGCTGACACTACTGATGCTGTCCGTGATCC  
 ACAGACACTTGAGATTCTTGACATTACACCATGT  
 TCTTTTGGTGGTGTGAGTGTATAACACCAGGAA  
 CAAATACTTCTAACCAGGTTGCTGTTCTTTATCAG  
 GATGTTAACTGCACAGAAGTCCCTGTTGCTATTC  
 ATGCAGATCAACTTACTCCTACTTGGCGTGTTTAT  
 TCTACAGGTTCTAATGTTTTTCAAACACGTGCAG  
 GCTGTTTAATAGGGGCTGAACATGTCAACAACCTC  
 ATATGAGTGTGACATACCCATTGGTGCAGGTATAT  
 GCGCTAGTTATCAGACTCAGACTAATTCTCGTCG  
GCGGGCACGTAGTGTAGCTAGTCAATCCATCATT  
 GCCTACACTATGTCACTTGGTGCAGAAAATTCAG  
 TTGCTTACTCTAATAACTCTATTGCCATACCCACA  
 AATTTTACTATTAGTGTACCACAGAAATTCTACC  
 AGTGTCTATGACCAAGACATCAGTAGATTGTACA  
 ATGTACATTTGTGGTGATTCAACTGAATGCAGCA  
 ATCTTTTGTTGCAATATGGCAGTTTTTGTACACA

**Green:** the primer sequence

**Red:** the recognition sites of crRNAs

|             |                                              |
|-------------|----------------------------------------------|
| crRNA-452-1 | UAAUUUCUACUAAGUGUAGAUCGUAUAGAU<br>UGUUUAGGA  |
| crRNA-452-2 | UAAUUUCUACUAAGUGUAGAUCGUAUAGAU<br>UGUUUAGGA  |
| crRNA-452-3 | UAAUUUCUACUAAGUGUAGAUCGUAUAGAU<br>UGUUUAGG   |
| crRNA-452-4 | UAAUUUCUACUAAGUGUAGAUCGUAUAGAU<br>UGUUUAGGAA |

|             |                                                 |
|-------------|-------------------------------------------------|
| crRNA-478-1 | UAAUUUCUACUAAGUGUAGAUGCUACCGGCCU<br>GAUAGAUU    |
| crRNA-478-2 | UAAUUUCUACUAAGUGUAGAUGCUACCGGCCU<br>GAUAGAUUUC  |
| crRNA-478-3 | UAAUUUCUACUAAGUGUAGAUGCUACCGGCCU<br>GAUAGAUUUCA |
| crRNA-478-4 | UAAUUUCUACUAAGUGUAGAUGCUACCGGCCU<br>GAUAGAUUU   |
| crRNA-681-1 | UAAUUUCUACUAAGUGUAGAUUCGUCGGCGGG<br>CACGUAGUG   |
| crRNA-681-2 | UAAUUUCUACUAAGUGUAGAUUCGACGGCGGG<br>CACGUAGUG   |
| crRNA-681-3 | UAAUUUCUACUAAGUGUAGAUUCGUCGGCGGG<br>CACGUAGUGT  |
| crRNA-681-4 | UAAUUUCUACUAAGUGUAGAUUCGUCGGCGGG<br>CACGUAGUGTA |

---

### **Procedure of PCR for plasmids.**

A 50  $\mu$ L PCR reaction mixture contained 25  $\mu$ L Phanta Max Master Mix (2x), 2  $\mu$ L forward primer (10  $\mu$ M), 2  $\mu$ L reverse primer (10  $\mu$ M), 2  $\mu$ L plasmid sample ( $10^8$  copies/ $\mu$ L), 19  $\mu$ L DNase/RNasefree water. The thermal cycling protocol included an initial activation of Taq polymerase at 95  $^{\circ}$ C for 3 min, followed by 35 cycles of 95  $^{\circ}$ C for 30 s, 58  $^{\circ}$ C for 30 s, and 72  $^{\circ}$ C for 90 s, and a final extension step at 72  $^{\circ}$ C for 2 min.

### **PCR samples detection with Cas12a-Microfluidic system.**

The CRISPR-Cas12a reaction reagents were preloaded in the outer chamber of the chip, which contained 0.5  $\mu$ L LbCas12a nuclease (5 $\mu$ M), 0.5  $\mu$ L crRNA (5  $\mu$ M), 0.5  $\mu$ L ssDNA reporter (5'-FAM-TTTTTTTT-BHQ1-

3', 5  $\mu$ M), 0.5  $\mu$ L tolo buffer (10x), 0.5  $\mu$ L 0.5% (w/w) trehalose. After vacuum drying for 15 min at 37  $^{\circ}$ C, the side of outer chamber was sealed. Then, a 30  $\mu$ L PCR reaction mixture was added to the inner chamber and the chip was sealed (Fig. S1). After that, the chip was put into the detection equipment, followed by low-speed rotation once at 2500 rpm for 5s and high-speed rotation once at 4600 rpm for 20 s. The PCR samples were allocated equally to outer chambers, where the CRISPR-Cas12a reaction occurred at 37  $^{\circ}$ C. The incubation time was set for 10 min. Real time fluorescence signals can be read directly from the screen of the detection equipment.

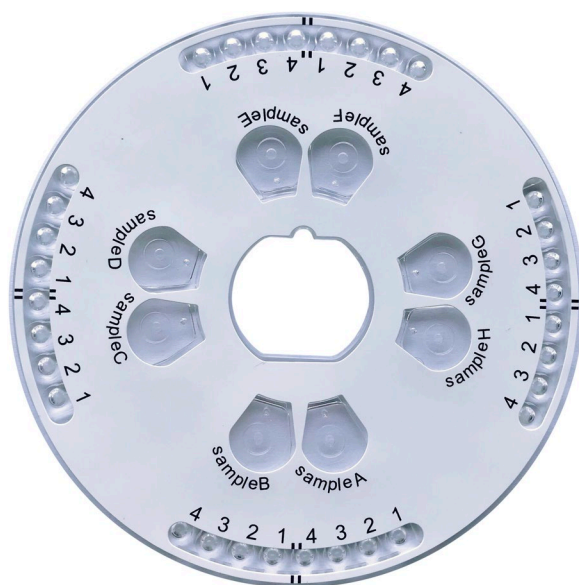

**Fig. S1** The picture of the microfluidic chip in this work.

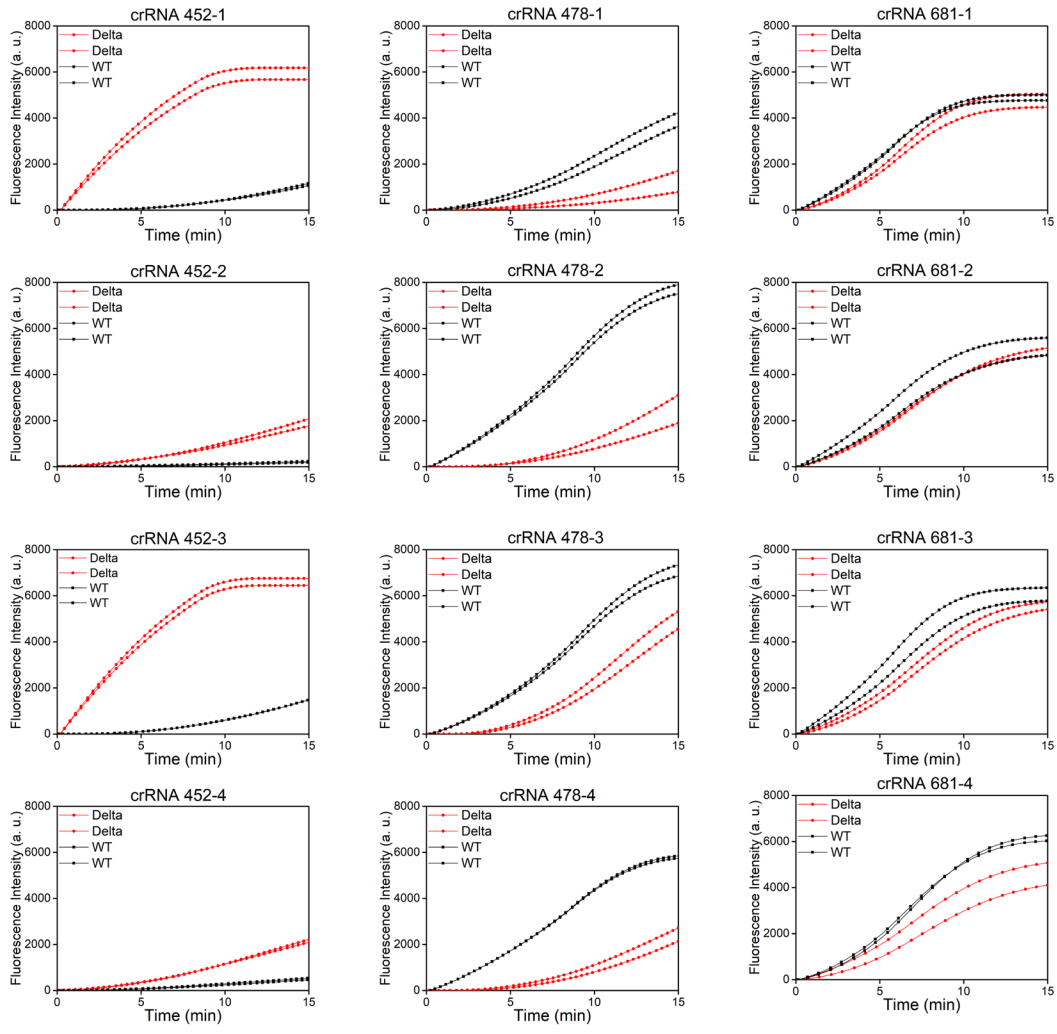

**Fig. S2** The screening results of crRNAs.

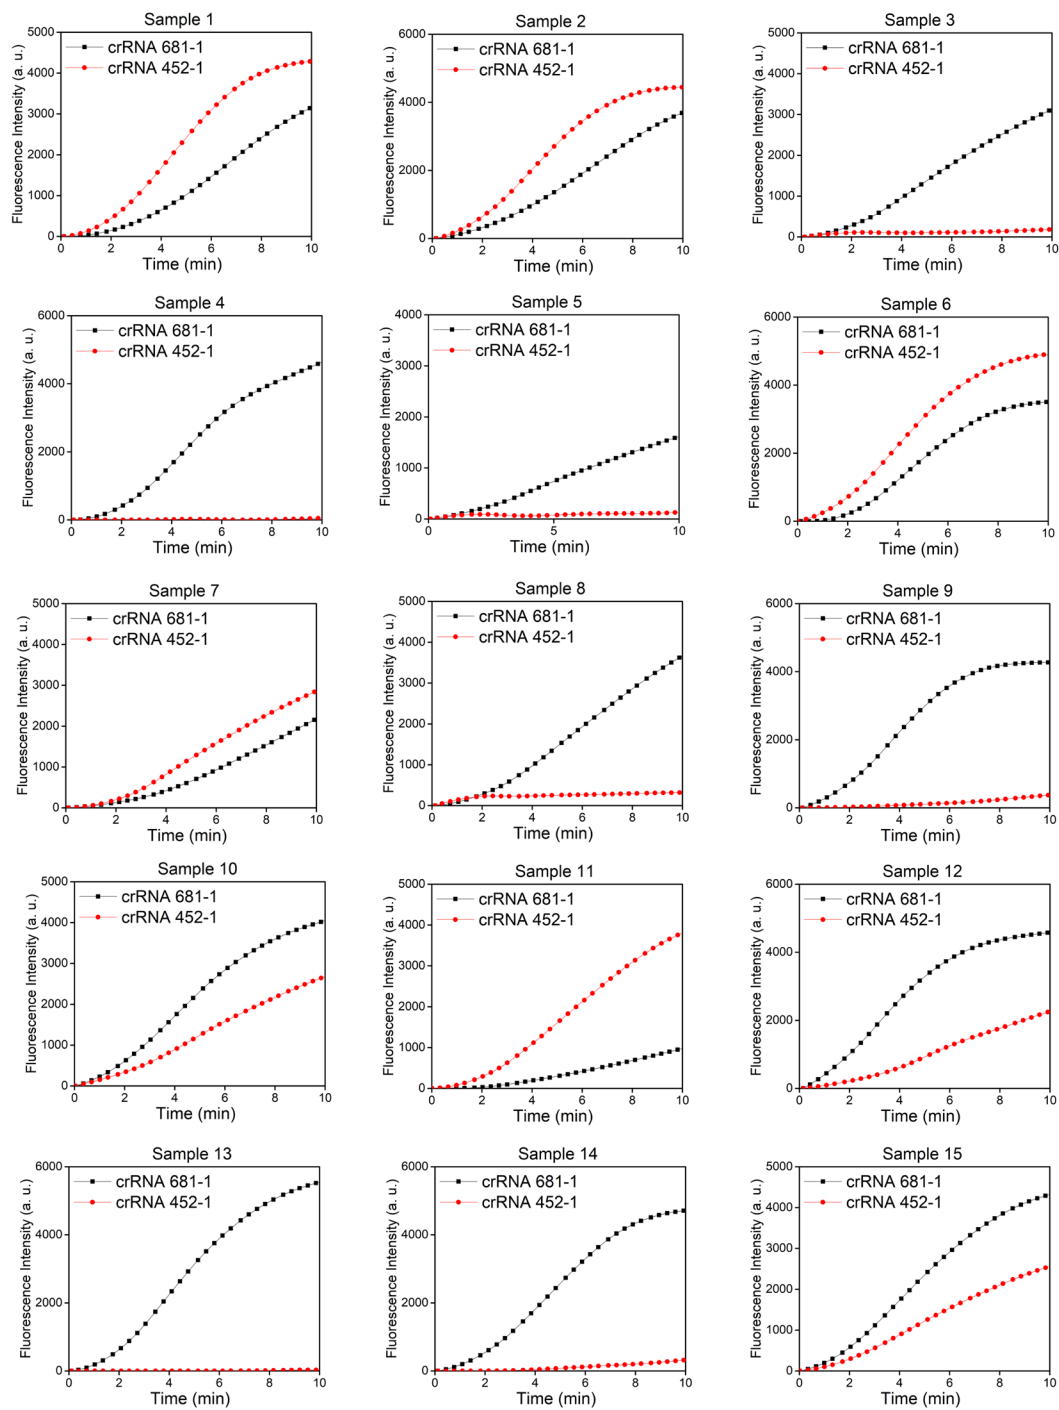

**Fig. S3** The real time fluorescence signals of clinical samples by Cas12a-Microfluidic system (sample 1 to sample 15).



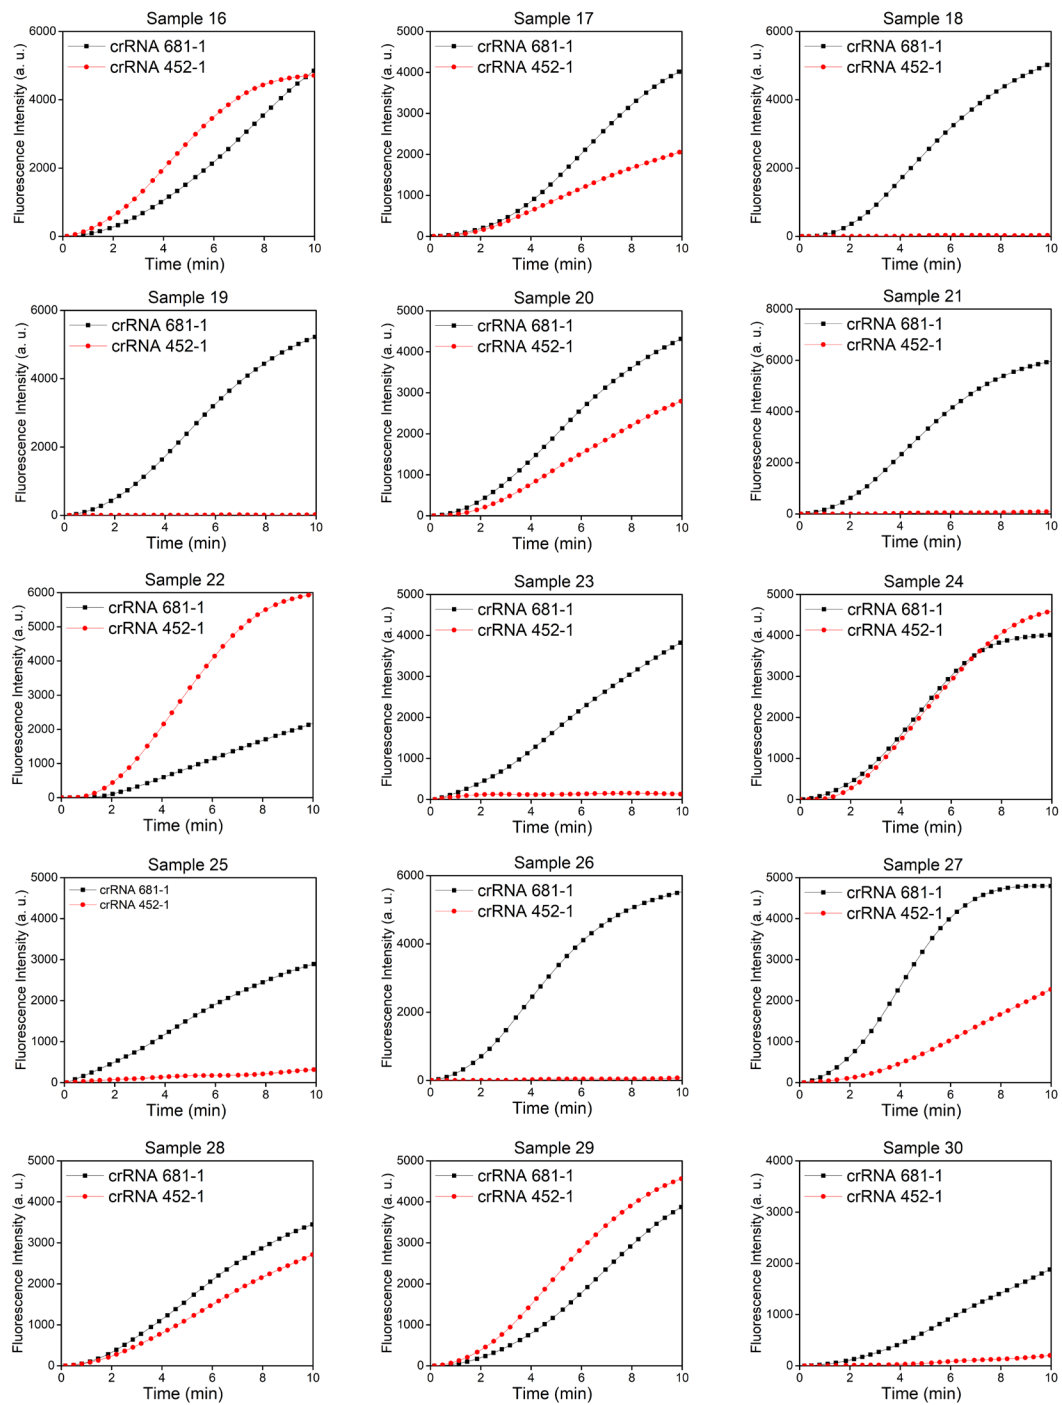

**Fig. S4** The real time fluorescence signals of clinical samples (sample 16 to sample 30).
